# Supplementary material for: Identification of an immune-metabolic biosignature linking depressive symptoms and breast cancer in a clinical population
Source: Research Square preprint supplement (doi:10.21203/rs.3.rs-7999917/v1), 2025-11-04
Supplement: Supplementary file 1 [file d8e363b0164e0aed5633e924.docx]

**Supplementary materials**

**Table S1. Mean and standard deviation (SD) of the biological variables collected and included in the analyses.**

| **Variable** | **Mean** | **SD** |
| --- | --- | --- |
| BMI | 25.12 | 3.82 |
| Leptin | 14.55 | 9.66 |
| Adiponectin | 7.82 | 6.38 |
| BDNF | 10.56 | 6.52 |
| IL-5 | 2.98 | 1.41 |
| IL-6 | 6.45 | 8.60 |
| IL-7 | 6.14 | 6.12 |
| IL-8 | 8.44 | 5.05 |
| IL-10 | 5.26 | 5.99 |
| IL-12 | 14.22 | 10.66 |
| IL-13 | 3.38 | 1.23 |
| CCL2 | 32.34 | 22.15 |
| CCL4 | 174.37 | 98.75 |
| TNF-α | 9.19 | 9.75 |
| Cortisol 8 a.m. | 7.38 | 4.82 |
| Cortisol 12 a.m. | 5.06 | 3.53 |
| Cortisol 6 p.m. | 4.32 | 3.34 |
| Cortisol (AUC) | 52.16 | 32.51 |

**Table S2. Eigenvalue, percent of variance explained and factor loadings by PCA of variables.** * PC loadings: < -0.50 or > 0.50, pointing out a strong correlation between the biological variable and the PCA factor. Total N. of subjects included: 44.

|  | **PC1** | **PC2** | **PC3** | **PC4** | **PC5** | **PC6** | **PC7** | **PC8** | **PC9** | **PC10** | **PC11** | **PC12** | **PC13** | **PC14** |
| --- | --- | --- | --- | --- | --- | --- | --- | --- | --- | --- | --- | --- | --- | --- |
| **Eigenvalue** | 3.54 | 2.70 | 1.86 | 1.34 | 1.18 | 0.78 | 0.68 | 0.60 | 0.41 | 0.31 | 0.28 | 0.14 | 0.13 | 0.06 |
| **Variance %** | 25.27 | 19.29 | 13.28 | 9.56 | 8.44 | 5.56 | 4.83 | 4.32 | 2.94 | 2.23 | 1.99 | 0.98 | 0.91 | 0.40 |
| **Cumulative variance %** | 25.27 | 44.56 | 57.84 | 67.40 | 75.84 | 81.40 | 86.23 | 90.55 | 93.49 | 95.73 | 97.71 | 98.69 | 99.60 | 100.00 |
|  |  |  |  |  |  |  |  |  |  |  |  |  |  |  |
| ***Leptin*** | **0.75*** | -0.45 | -0.21 | -0.20 | -0.07 | -0.20 | 0.00 | 0.03 | 0.15 | 0.03 | 0.12 | 0.12 | 0.23 | 0.03 |
| ***Adiponectin*** | **-0.78*** | 0.31 | 0.00 | 0.25 | -0.08 | 0.22 | 0.01 | 0.00 | -0.03 | -0.14 | 0.38 | -0.01 | 0.09 | 0.04 |
| ***BDNF*** | -0.10 | -0.23 | 0.23 | **0.68*** | 0.08 | **-0.56*** | -0.17 | 0.22 | -0.12 | 0.08 | 0.06 | 0.00 | -0.02 | 0.00 |
| ***IL-5*** | 0.26 | **0.71*** | -0.23 | 0.17 | 0.42 | -0.02 | -0.11 | -0.31 | -0.08 | 0.09 | -0.01 | 0.18 | -0.04 | 0.09 |
| ***IL-6*** | 0.04 | 0.26 | **0.65*** | **-0.52*** | 0.06 | 0.00 | 0.13 | 0.33 | -0.31 | 0.04 | 0.02 | 0.07 | 0.01 | 0.05 |
| ***IL-7*** | **0.84*** | -0.05 | -0.26 | -0.11 | -0.17 | -0.11 | 0.21 | 0.04 | 0.00 | -0.04 | 0.28 | 0.02 | -0.21 | -0.02 |
| ***IL-8*** | **0.79*** | -0.07 | 0.11 | 0.23 | 0.16 | 0.16 | -0.20 | 0.10 | -0.11 | -0.43 | -0.08 | 0.01 | 0.01 | 0.00 |
| ***IL-10*** | 0.22 | **0.55*** | 0.05 | 0.42 | **-0.60*** | 0.12 | 0.22 | 0.04 | -0.08 | 0.04 | -0.10 | 0.14 | 0.05 | -0.08 |
| ***IL-12*** | 0.46 | **0.69*** | 0.31 | 0.11 | -0.27 | -0.16 | 0.14 | -0.02 | 0.23 | -0.03 | -0.05 | -0.16 | 0.02 | 0.12 |
| ***IL-13*** | **0.58*** | 0.48 | -0.43 | 0.05 | 0.32 | 0.09 | 0.03 | 0.10 | -0.21 | 0.15 | 0.05 | -0.19 | 0.10 | -0.06 |
| ***CCL2*** | **0.51*** | -0.28 | 0.38 | 0.20 | -0.13 | 0.47 | -0.38 | 0.09 | 0.09 | 0.25 | 0.07 | 0.00 | -0.04 | 0.03 |
| ***CCL4*** | 0.09 | -0.32 | 0.32 | 0.36 | **0.55*** | 0.20 | **0.52*** | 0.09 | 0.17 | 0.03 | -0.01 | 0.03 | 0.01 | 0.00 |
| ***TNF-a*** | 0.03 | **0.69*** | **0.52*** | -0.21 | 0.26 | -0.15 | -0.20 | 0.01 | 0.28 | -0.03 | 0.09 | 0.04 | 0.00 | -0.13 |
| ***AUC-cortisol*** | -0.30 | 0.35 | **-0.64*** | -0.02 | 0.07 | 0.07 | -0.08 | **0.56*** | 0.20 | -0.01 | -0.07 | 0.06 | -0.04 | 0.03 |


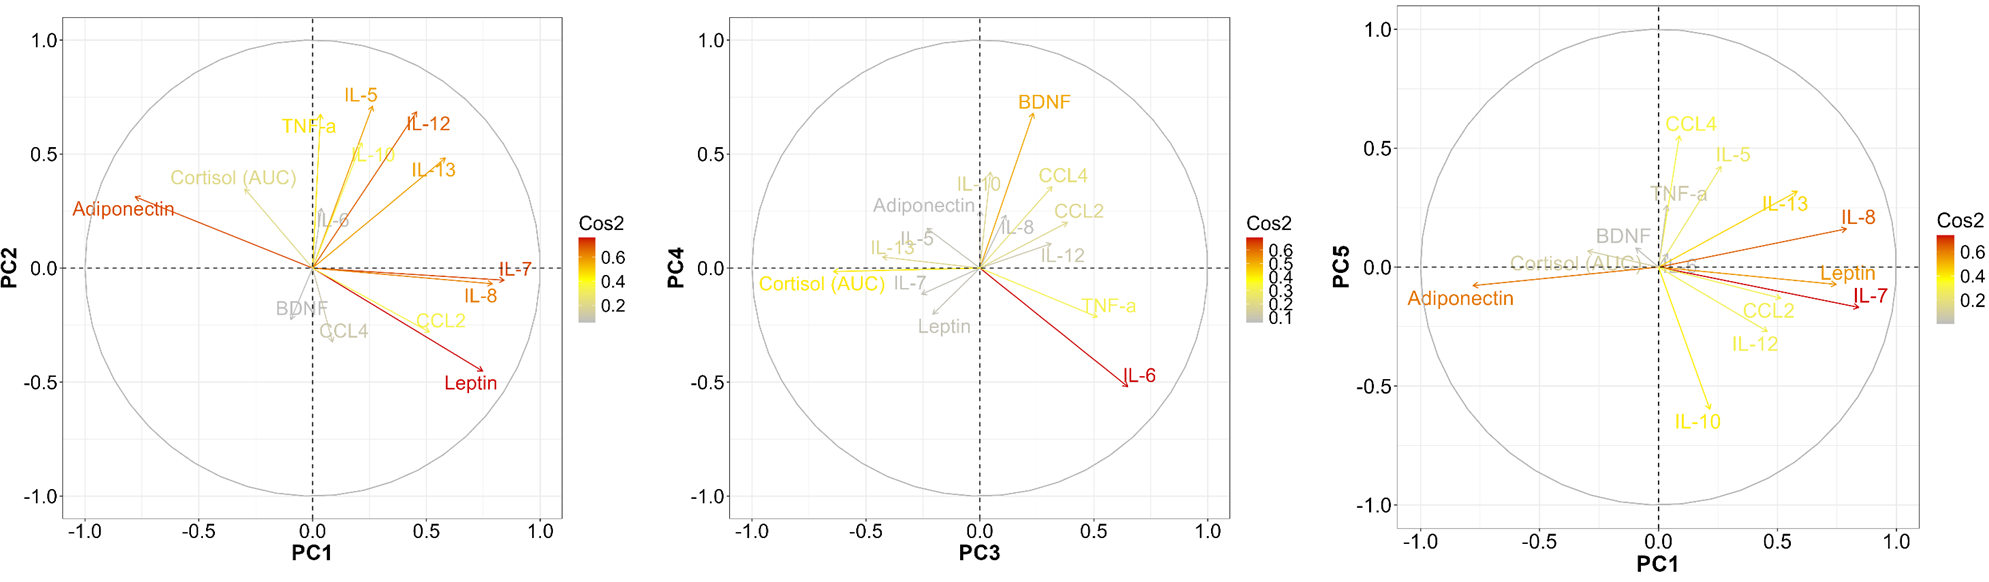


**Figure S1. Correlation between variables and PC factors.** Leptin positively correlates with PC1, as well as IL-7 and IL-8; by contrast, adiponectin negatively correlates with this PC. A little contribution of IL-13 is also observed. AS for PC2, it mainly correlates with IL-5, IL-12 and TNF- α. IL-6 and cortisol are associated with PC3 showing opposite directions, while only BDNF appears to be correlated with PC4. CCL4 positively correlates with PC5 and the opposite is true for IL-10.


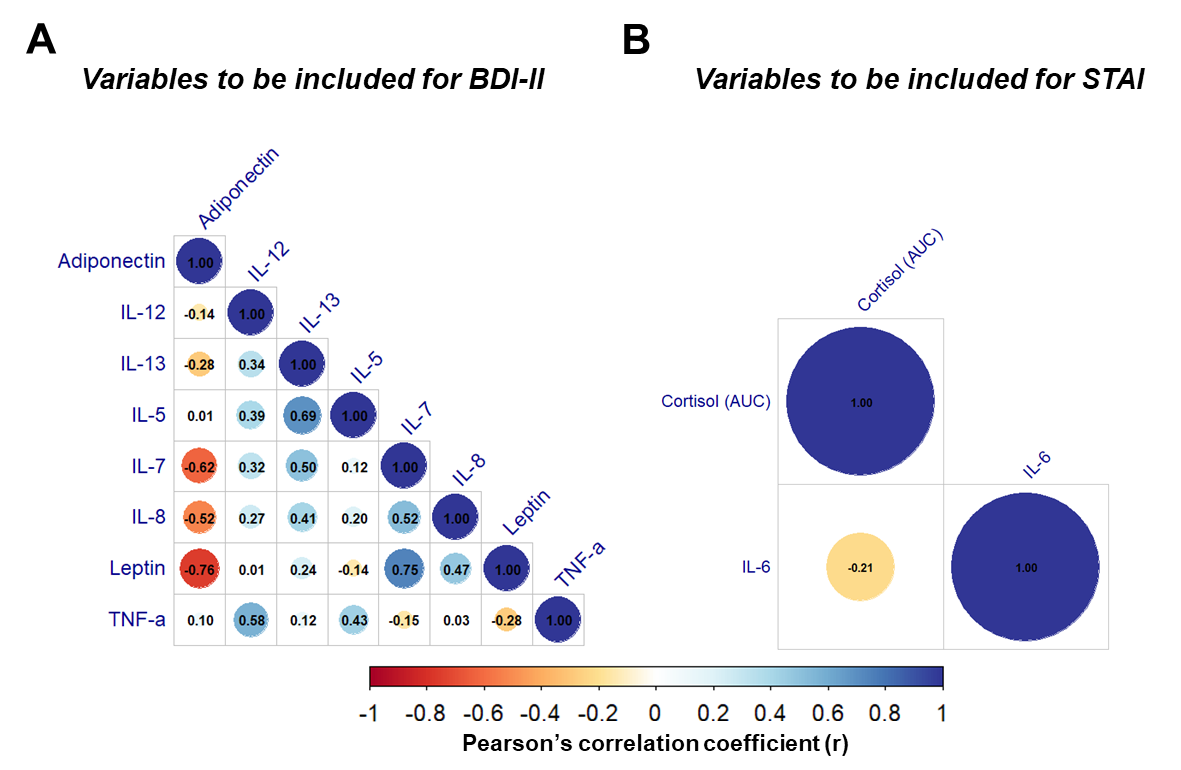


**Figure S2. Correlation between biological variables. A) Correlation between variables representing PC1 and PC2 to choose predictors of depressive symptoms.** Leptin, IL-5 and IL-12 were used as independent variables. **B) Correlation between variables representing PC3 to choose predictors of anxiety symptoms.** IL-6 and cortisol (AUC) were added to the model.

***Table S3. Logistic regression outcome of the full model evaluating the association between biological markers and depressive symptoms (High-DS vs. Low-DS)*.** ** p<0.05, ^ p<0.10 pointing out an association between the biological variable and depressive symptoms. Total N. of subjects included: 43.*

|  | **β coefficient** | **z-value** | **p-value** | **Odds ratio** | **95% C.I.** |
| --- | --- | --- | --- | --- | --- |
| ***Intercept*** | *-5.7819* | *-1.231* | *0.2184* | 0.0031 | 3.09e-07 - 30.7557 |
| **Leptin** | -0.1470 | -2.271 | **0.0231*** | 0.8633 | 0.7604 - 0.9800 |
| **IL-5** | 1.0296 | 1.632 | 0.1027 | 2.7999 | 0.8129 - 9.6429 |
| **IL-12** | -0.0946 | -1.422 | 0.1551 | 0.9097 | 0.7943 - 1.0365 |
| **Age** | -0.0493 | -0.590 | 0.5553 | 0.9519 | 0.8082 - 1.1213 |
| **Staging** | 0.1894 | 0.273 | 0.7852 | 1.2085 | 0.3096 - 4.7168 |
| **Grading** | 0.3024 | 0.209 | 0.8347 | 1.3531 | 0.0791 - 23.1513 |
| **Surgery** | 0.3311 | 0.289 | 0.7724 | 1.3926 | 0.1476 - 13.1393 |
| **HER2+** | 1.3389 | 0.967 | 0.3337 | 3.8148 | 0.2526 - 57.6106 |
| **ER+** | -18.0317 | -0.007 | 0.9947 | <0.0001 | 0.00e+00 - Inf |
| **PgR+** | 17.6760 | 0.006 | 0.9948 | 4.75E+07 | 0.00e+00 - Inf |
| **BMI** | 0.2980 | 1.654 | **0.0980^** | 1.3471 | 0.9465 - 1.9174 |

**Table S4. Logistic regression outcome of the second model evaluating the association between biological markers and depressive symptoms (High-DS vs. Low-DS).** Only BMI was included as covariate. * p<0.05, ^ p<0.10 pointing out an association between the biological variable and depressive symptoms. Total N. of subjects included: 43.

|  | **β coefficient** | **z-value** | **p-value** | **Odds ratio** | **95% C.I.** |
| --- | --- | --- | --- | --- | --- |
| ***Intercept*** | *-6.0936* | *-1.930* | *0.0535* | 0.0023 | 4.64e-06 - 1.0975 |
| **Leptin** | -0.1388 | -2.571 | **0.0101*** | 0.8704 | 0.7830 - 0.9675 |
| **IL-5** | 0.7446 | 1.667 | **0.0955^** | 2.1056 | 0.8773 - 5.0535 |
| **IL-12** | -0.0539 | -1.173 | 0.2409 | 0.9475 | 0.8659 - 1.0368 |
| **BMI** | 0.2343 | 2.044 | **0.0410*** | 1.2641 | 1.0096 - 1.5826 |

***Table S5.******Logistic regression outcome of the final model evaluating the association between biological markers and depressive symptoms (High-DS vs. Low-DS).*** *Only leptin and IL-5 were kept as independent variables; only BMI was included as covariate. * p<0.05, ** p<0.01 pointing out an association between the biological variable and depressive symptoms. Total N. of subjects included: 43.*

|  | **β coefficient** | **z-value** | **p-value** | **Odds ratio** | **95% C.I.** |
| --- | --- | --- | --- | --- | --- |
| ***Intercept*** | *-6.1244* | *-2.004* | *0.0451* | 0.0022 | 5.48e-06 - 0.8742 |
| **Leptin** | -0.1364 | -2.605 | **0.0092**** | 0.8725 | 7.87e-01 - 0.9668 |
| **IL-5** | 0.5601 | 1.371 | 0.1703 | 1.7508 | 7.86e-01 - 3.8982 |
| **BMI** | 0.2272 | 2.055 | **0.0399*** | 1.2551 | 1.01e+00 - 1.5589 |

***Table S6. Logistic regression outcome of the full model evaluating the association between biological markers and anxiety symptoms (High-AS vs. Low-AS).*** ** p<0.05, ^ p<0.10 pointing out an association between the biological variable and anxiety symptoms. Total N. of subjects included: 43.*

|  | **β coefficient** | **z-value** | **p-value** | **Odds ratio** | **95% C.I.** |
| --- | --- | --- | --- | --- | --- |
| ***Intercept*** | *10.3149* | *2.039* | *0.0415* | 3.02E+04 | 1.4901 - 6.11e+08 |
| **IL-6** | -0.0393 | -0.528 | 0.5974 | 0.9319 | 0.8762 - 0.9910 |
| **Cortisol (AUC)** | -0.0706 | -2.247 | **0.0246*** | 0.9614 | 0.8310 - 1.1124 |
| **Age** | -0.0801 | -1.181 | 0.2375 | 0.9231 | 0.8083 - 1.0542 |
| **Staging** | -0.3150 | -0.437 | 0.6623 | 0.7298 | 0.1775 - 2.9997 |
| **Grading** | 0.5115 | 0.447 | 0.6548 | 1.6678 | 0.1771 - 15.7026 |
| **Surgery** | 0.6042 | 0.555 | 0.5789 | 1.8297 | 0.2167 - 15.4509 |
| **HER2+** | 3.2616 | 1.817 | **0.0692^** | 26.0906 | 0.7740 - 879.4295 |
| **ER+** | 0.2979 | 0.187 | 0.8513 | 1.3471 | 0.0598 - 30.3685 |
| **PgR+** | 2.1141 | 1.436 | 0.1510 | 8.2821 | 0.4623 - 148.3717 |
| **BMI** | -0.1227 | -0.798 | 0.4247 | 0.8845 | 0.6545 - 1.1954 |

**Table S7. Logistic regression outcome of the final model evaluating the association between biological markers and anxiety symptoms (High-AS vs. Low-AS).** Only IL-6 and cortisol (AUC) were kept as independent variables; only HER2 was included as covariate. * p<0.05, pointing out an association between the biological variable and anxiety symptoms. Total N. of subjects included: 43.

|  | **β coefficient** | **z-value** | **p-value** | **Odds ratio** | **95% C.I.** |
| --- | --- | --- | --- | --- | --- |
| ***Intercept*** | *2.0706* | *2.156* | *0.0311* | 7.9296 | 1.2069 - 52.0973 |
| **IL-6** | 0.0255 | 0.410 | 0.6816 | 1.0258 | 0.9082 - 1.1587 |
| **Cortisol (AUC)** | -0.0296 | -1.994 | **0.0462*** | 0.9789 | 0.9430 - 0.9995 |
| **HER2+** | 1.6658 | 1.350 | 0.1769 | 5.2898 | 0.4715 - 59.3575 |

***Table S8. Logistic regression outcome of the full model evaluating the association between biological markers and stress symptoms (High-SS vs. Low-SS).*** *Total N. of subjects included: 43.*

|  | **β coefficient** | **z-value** | **p-value** | **Odds ratio** | **95% C.I.** |
| --- | --- | --- | --- | --- | --- |
| ***Intercept*** | *-2.5033* | *-0.630* | *0.5290* | 0.0818 | 3.39e-05 - 197.2581 |
| **BDNF** | 0.0270 | 0.387 | 0.6990 | 1.0274 | 0.8959 - 1.1782 |
| **Age** | 0.0523 | 0.885 | 0.3760 | 1.0537 | 0.9385 - 1.1830 |
| **Staging** | -0.7833 | -1.087 | 0.2770 | 0.4569 | 0.1113 - 1.8760 |
| **Grading** | -0.0433 | -0.042 | 0.9660 | 0.9576 | 0.1273 - 7.2042 |
| **Surgery** | 1.1372 | 1.169 | 0.2430 | 3.1181 | 0.4631 - 20.9960 |
| **HER2+** | 0.9178 | 0.893 | 0.3720 | 2.5037 | 0.3341 - 18.7646 |
| **ER+** | 1.1616 | 0.777 | 0.4370 | 3.1951 | 0.1708 - 59.7578 |
| **PgR+** | -1.8428 | -1.451 | 0.1470 | 0.1584 | 0.01315 - 1.9071 |
| **BMI** | -0.0198 | -0.127 | 0.8990 | 0.9804 | 0.7233 - 1.3290 |

**Table S9. Logistic regression outcome of the final model evaluating the association between biological markers and stress symptoms** **(High-SS vs. Low-SS).** Only BDNF was kept as independent variable; no covariate was included. Total N. of subjects included: 43.

|  | **β coefficient** | **z-value** | **p-value** | **Odds ratio** | **95% C.I.** |
| --- | --- | --- | --- | --- | --- |
| ***Intercept*** | *-1.7835* | *-2.413* | *0.0158* | 0.1680 | 0.0395 - 0.7153 |
| **BDNF** | 0.0613 | 1.111 | 0.2666 | 1.0632 | 0.9542 - 1.1846 |
